# Supplementary material for: Identification and Replication of a Combined Epigenetic and Genetic Biomarker Predicting Suicide and Suicidal Behaviors
Source: Atypon-hosted journal article supplement (doi:10.1176/appi.ajp.2014.14010008), 2014-07-30
Supplement: appi.ajp.2014.14010008.ds001.pdf [file appi.ajp.2014.14010008.ds001.pdf]

 


Psychiatry Online
